# Supplementary material for: Effect of the extended π-surface and N-butyl substituents of imidazoles on their reactivity, electrochemical behaviours and biological interactions of corresponding Pt(ii)-CNC carbene complexes: exploring DFT and docking interactions
Source: Royal Society of Chemistry journal article supplement (doi:10.1039/d4nj00552j), 2024-01-01
Supplement: d4nj00552j1.pdf [file d4nj00552j1.pdf]

ELECTRONIC SUPPLEMENTARY INFORMATION (ESI)

**Effect of extended  $\pi$ -surface and N-butyl substituents of imidazoles on the reactivity, electrochemical behaviours and biological interactions of corresponding Pt(II)-C<sup>N</sup>C pincer carbene complexes; Exploring DFT and docking interactions.**

Rajesh Bellam\*<sup>a</sup>, Daniel Omondi Onunga<sup>a,b</sup>, Deogratius Jaganyi<sup>c,d</sup>, Ross Robinson<sup>a</sup> and Allen Mambanda<sup>a</sup>

<sup>a</sup>School of Chemistry and Physics, University of KwaZulu-Natal, Private Bag X01, Scottsville, Pietermaritzburg 3209, South Africa.

<sup>b</sup>Department of Chemistry, Maseno University, Maseno, Kenya.

<sup>c</sup>School of Pure and Applied Sciences, Mount Kenya University, Thika, Kenya.

<sup>d</sup>Department of Chemistry, Durban University of Technology, P.O. Box 1334, Durban 4000, South Africa.

\*Rajesh Bellam: [rajeshchowdarybellam@gmail.com](mailto:rajeshchowdarybellam@gmail.com)

| S. No. | Content                                                                                                                                             | Page No. |
|--------|-----------------------------------------------------------------------------------------------------------------------------------------------------|----------|
| 1.     | <sup>1</sup> H NMR spectra of ligands ( <b>L<sub>1</sub></b> , <b>L<sub>2</sub></b> , and <b>L<sub>3</sub></b> )                                    | S2       |
| 2.     | TOF-MS spectra of ligands ( <b>L<sub>1</sub></b> , <b>L<sub>2</sub></b> , and <b>L<sub>3</sub></b> )                                                | S3       |
| 3.     | <sup>1</sup> H NMR spectra of Complexes ( <b>PtL<sub>1</sub></b> , <b>PtL<sub>2</sub></b> , and <b>PtL<sub>3</sub></b> )                            | S5       |
| 4.     | TOF-MS spectra of Complexes ( <b>PtL<sub>1</sub></b> , <b>PtL<sub>2</sub></b> , and <b>PtL<sub>3</sub></b> )                                        | S6       |
| 5.     | Stability study of the <b>PtL<sub>1</sub></b> , <b>PtL<sub>2</sub></b> and <b>PtL<sub>3</sub></b>                                                   | S8       |
| 6.     | Linear plots of <i>k</i> <sub>obs</sub> versus [Nu] for the reaction of <b>PtL<sub>2</sub></b> and <b>PtL<sub>3</sub></b>                           | S8       |
| 7.     | Eyring plots for the reactions                                                                                                                      | S9       |
| 8.     | Iso-kinetic plot                                                                                                                                    | S9       |
| 9.     | DFT optimized structure of <b>PtL<sub>3</sub></b>                                                                                                   | S9       |
| 10.    | Effect of scan rate on the CV for 1.0 mM of <b>PtL<sub>2</sub></b> and <b>PtL<sub>3</sub></b>                                                       | S10      |
| 11.    | Absorption spectral changes of <b>PtL<sub>2</sub></b> and <b>PtL<sub>3</sub></b> with CT-DNA                                                        | S11      |
| 12.    | Fluorescence emission spectral changes of EtBr in the presence of <b>PtL<sub>2</sub></b> and <b>PtL<sub>3</sub></b>                                 | S11      |
| 13.    | Cyclic voltammograms of <b>PtL<sub>2</sub></b> and <b>PtL<sub>3</sub></b> without and with CT-DNA                                                   | S12      |
| 14.    | Relative viscosities of CT-DNA with <b>PtL<sub>1</sub></b> , <b>PtL<sub>2</sub></b> and <b>PtL<sub>3</sub></b>                                      | S13      |
| 15.    | Absorption spectra BSA with and without <b>PtL<sub>1</sub></b> , <b>PtL<sub>2</sub></b> and <b>PtL<sub>3</sub></b>                                  | S13      |
| 16.    | Fluorescence emission spectral changes of BSA in the presence of <b>PtL<sub>2</sub></b> and <b>PtL<sub>3</sub></b>                                  | S14      |
| 17.    | Docking poses of <b>PtL<sub>2</sub></b> and <b>PtL<sub>3</sub></b> in BSA                                                                           | S15      |
| 18.    | Summary of the <i>k</i> <sub>2</sub> at 25, 45 and 55 °C                                                                                            | S15      |
| 19.    | DFT-calculated data for <b>PtL<sub>1</sub></b> , <b>PtL<sub>2</sub></b> and <b>PtL<sub>3</sub></b>                                                  | S16      |
| 20.    | Electrochemical potentials and current values of <b>PtL<sub>1</sub></b> , <b>PtL<sub>2</sub></b> and <b>PtL<sub>3</sub></b> with and without CT-DNA | S16      |

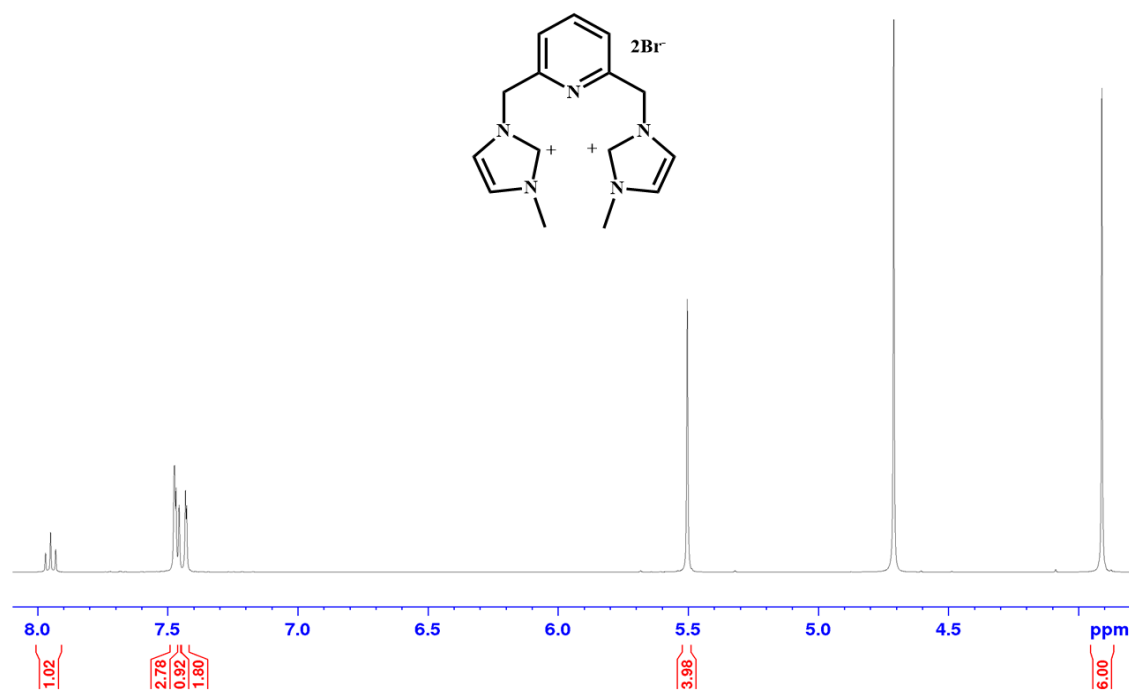

Fig. S1: <sup>1</sup>H NMR spectrum of 2,6-bis[(3-methylimidazolium-1-yl)methyl]pyridine; L<sub>1</sub> (400 MHz, (CD<sub>3</sub>)<sub>2</sub>SO).

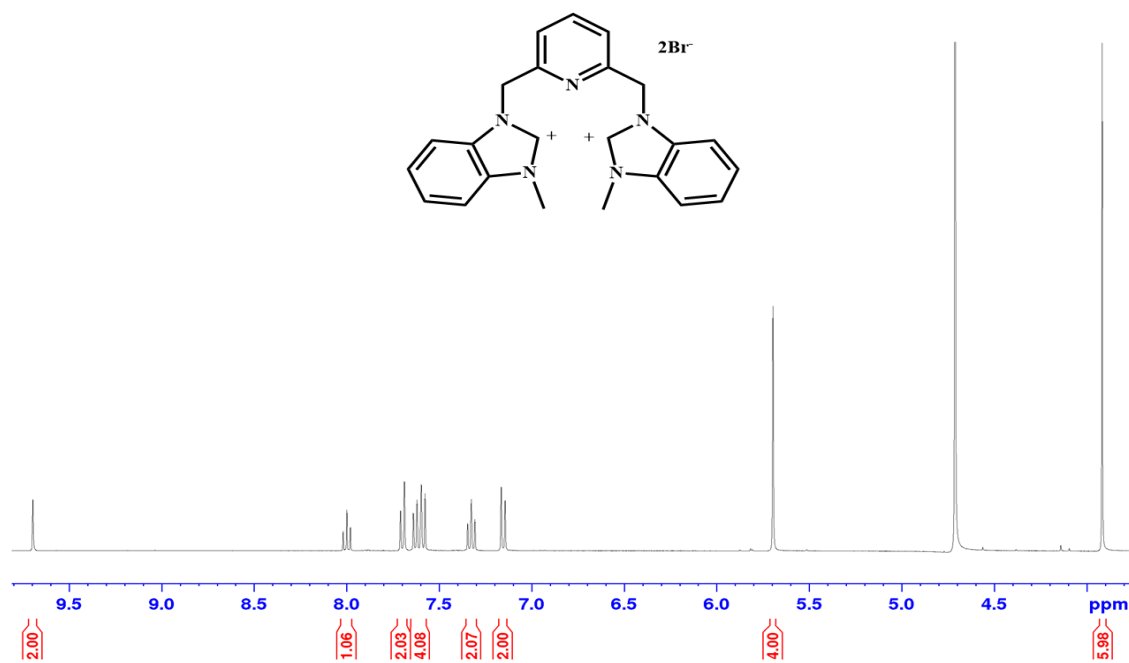

Fig. S2: <sup>1</sup>H NMR spectrum of 2,6-bis[(3-methylbenzimidazol-1-yl)methyl]pyridine; L<sub>2</sub> (400 MHz, (CD<sub>3</sub>)<sub>2</sub>SO).

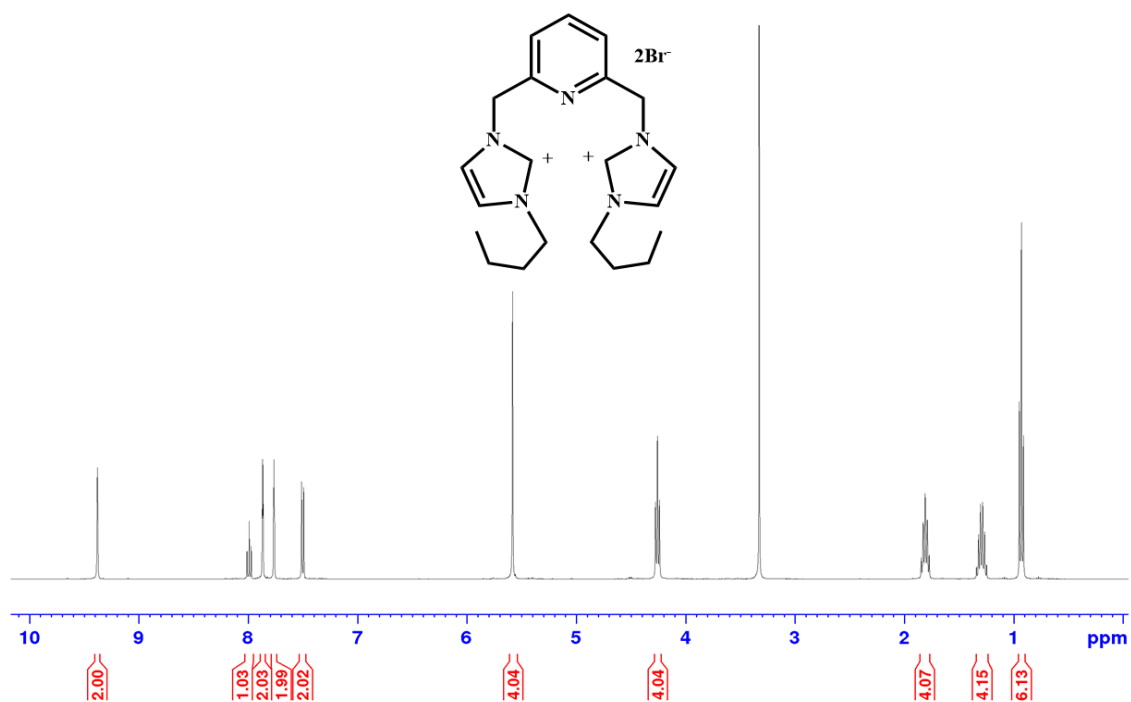

**Fig. S3:**  $^1\text{H}$  NMR spectrum of 2,6-bis[(3-butylimidazol-1-yl)methyl]pyridine;  $\text{L}_3$  (400 MHz,  $(\text{CD}_3)_2\text{SO}$ ).

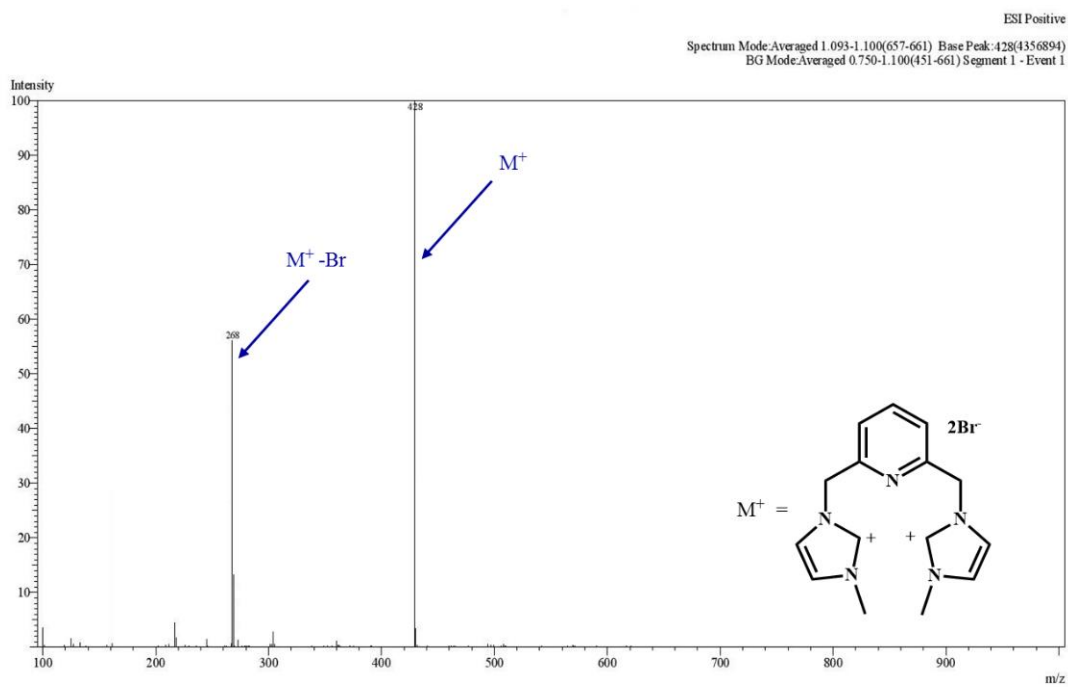

**Fig. S4:** TOF-MS spectra of 2,6-bis[(3-methylimidazolium-1-yl)methyl]pyridine;  $\text{L}_1$

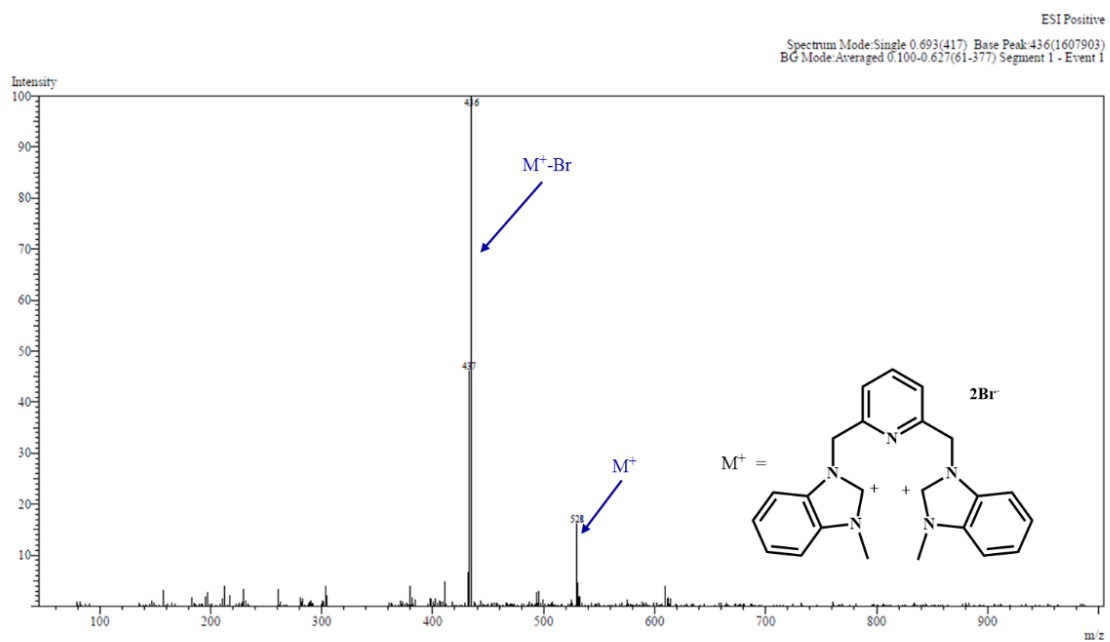

**Fig. S5:** TOF-MS spectra of 2,6-bis[(3-methylbenzimidazol-1-yl)methyl]pyridine;  $L_2$

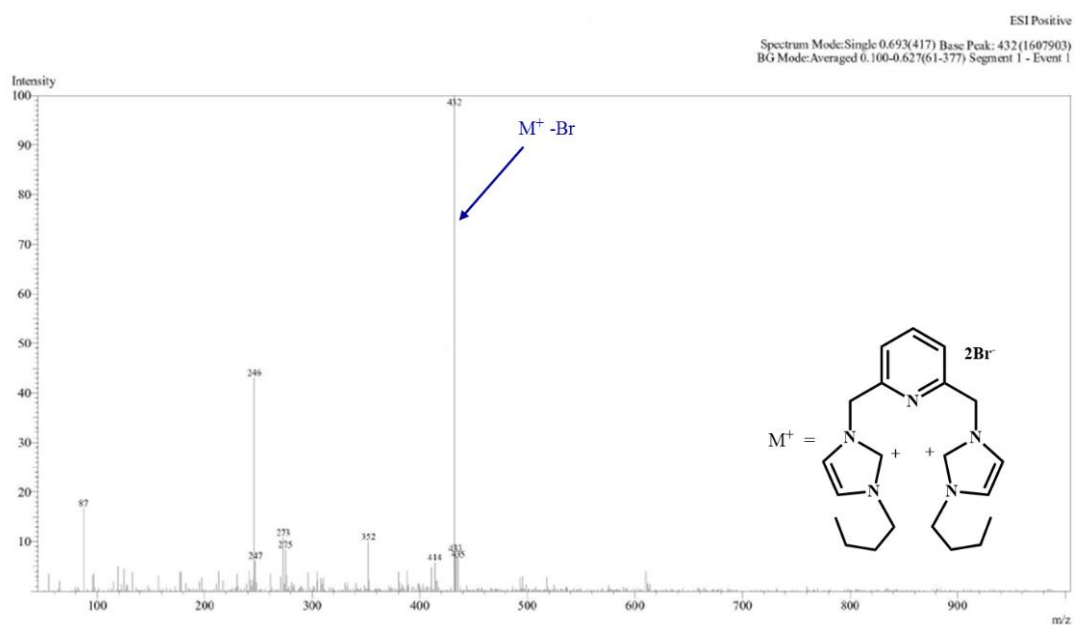

**Fig. S6:** TOF-MS spectra of 2,6-bis[(3-butylimidazol-1-yl)methyl]pyridine;  $L_3$

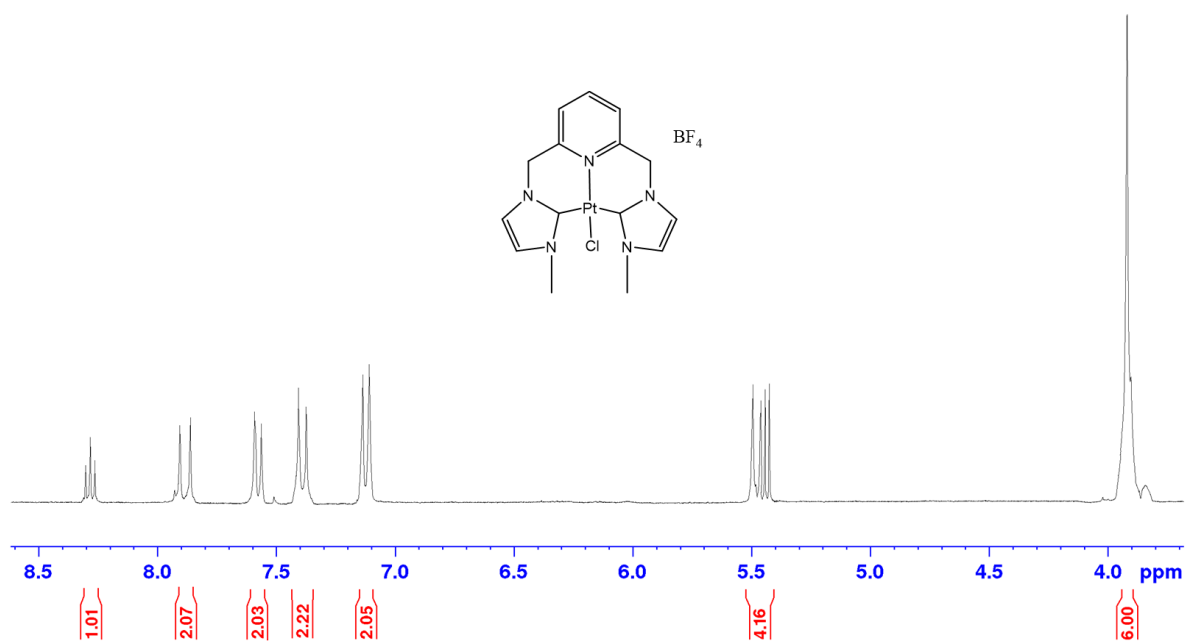

**Fig. S7:** <sup>1</sup>H NMR spectrum of 2,6-bis[(3-methylimidazolium-1-yl)methyl]pyridine platinum(II) chloride tetrafluoroborate; **PtL<sub>1</sub>** (400 MHz, (CD<sub>3</sub>)<sub>2</sub>SO).

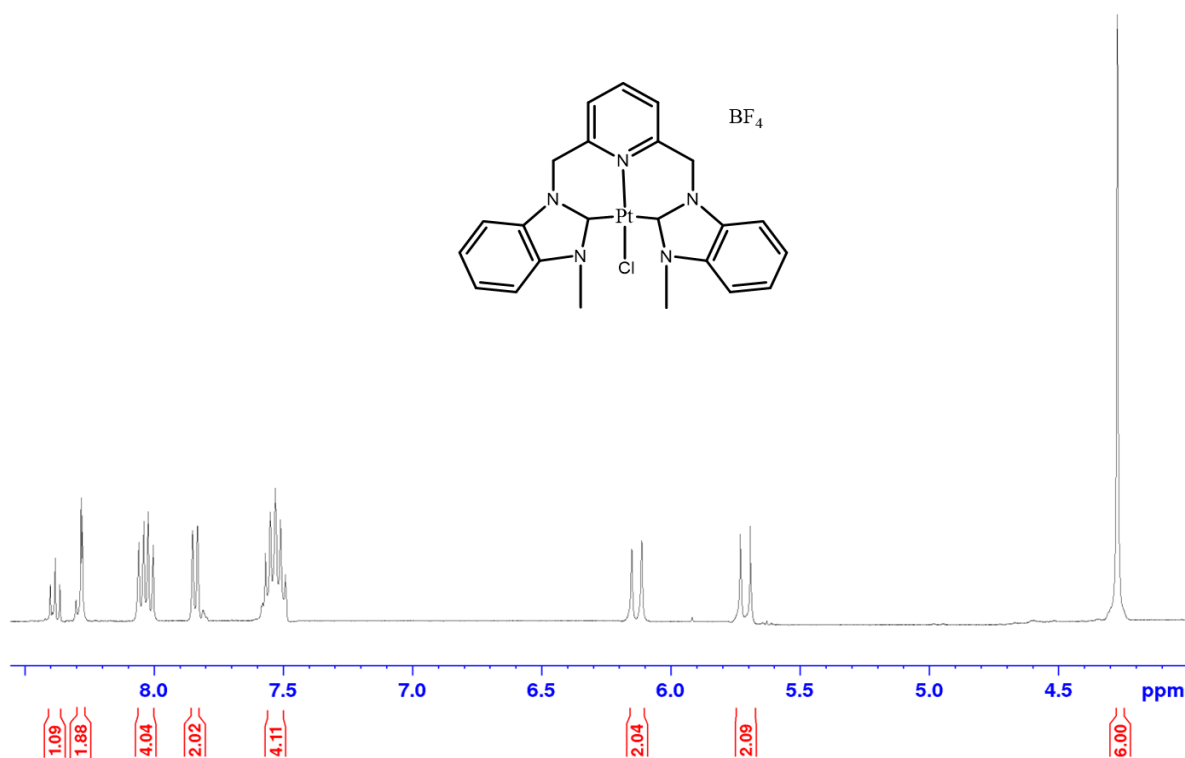

**Fig. S8:** <sup>1</sup>H NMR spectrum of 2,6-bis[(3-methylbenzimidazol-1-yl)methyl]pyridine platinum(II) chloride tetrafluoroborate; **PtL<sub>2</sub>** (400 MHz, (CD<sub>3</sub>)<sub>2</sub>SO).

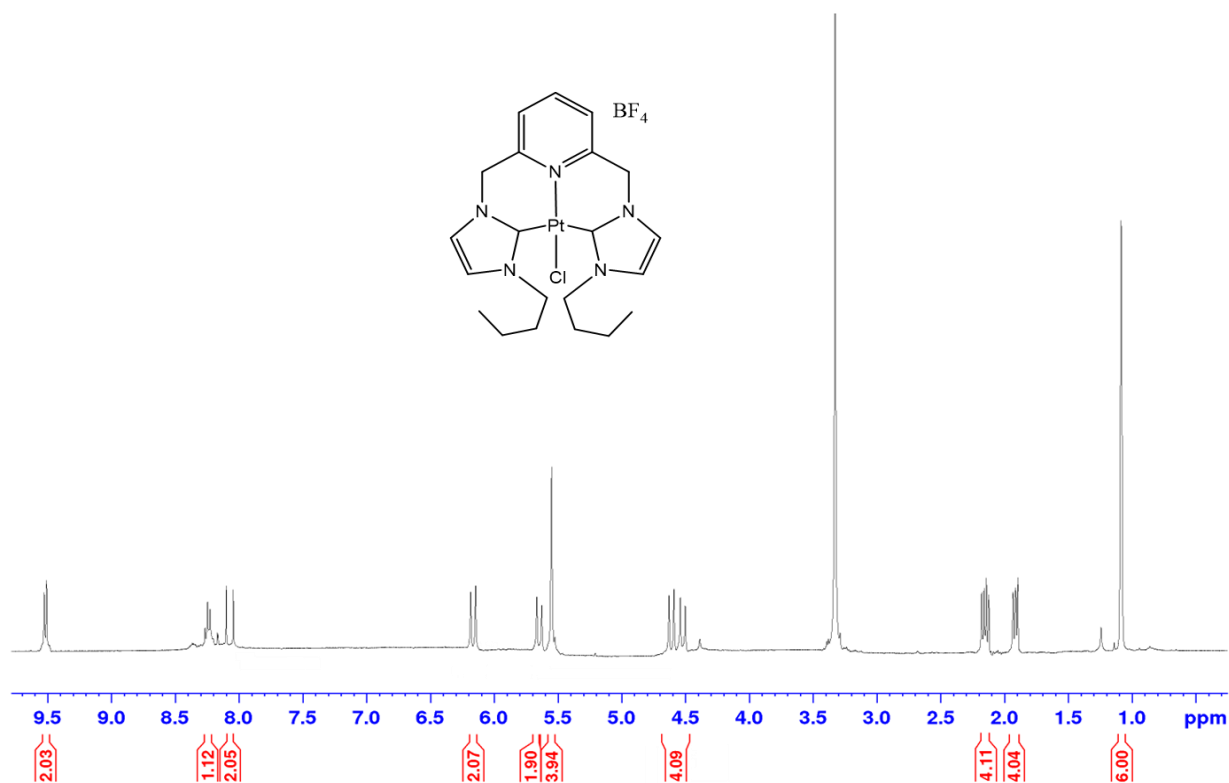

**Fig. S9:**  $^1\text{H}$  NMR spectrum of 2,6-bis[(3-butylimidazol-1-yl)methyl]pyridine platinum(II) chloride tetrafluoroborate,  $\text{PtL}_3$  (400 MHz,  $(\text{CD}_3)_2\text{SO}$ ).

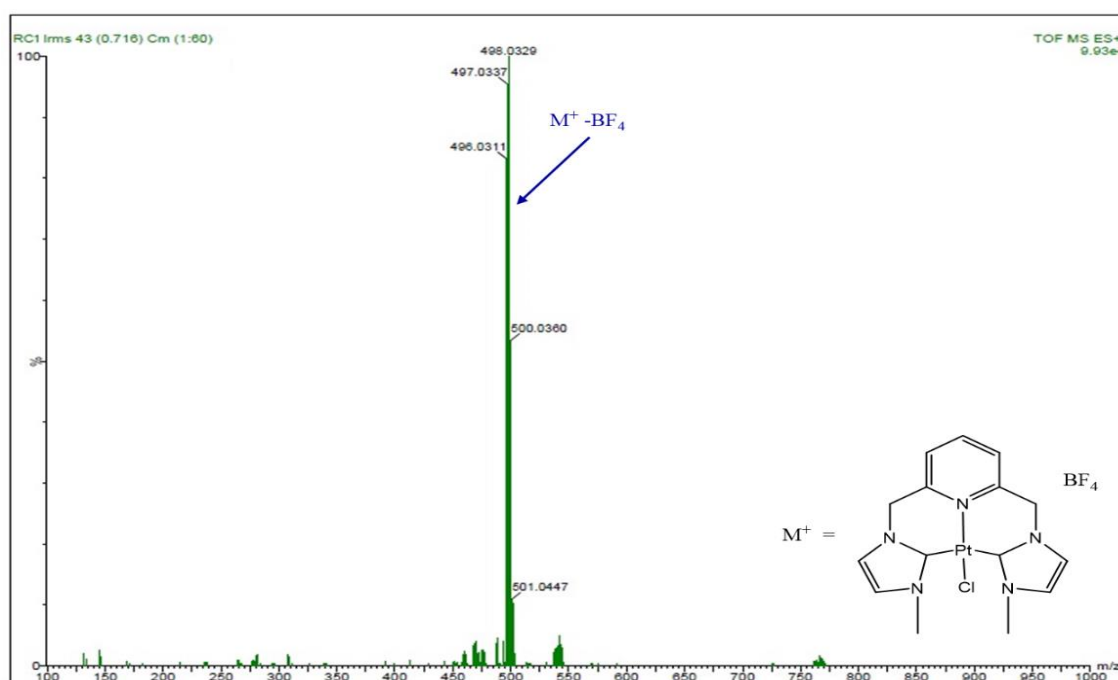

**Fig. S10:** TOF-MS spectra of 2,6-bis[(3-methylimidazolium-1-yl)methyl]pyridine platinum(II) chloride tetrafluoroborate complex;  $\text{PtL}_1$ .

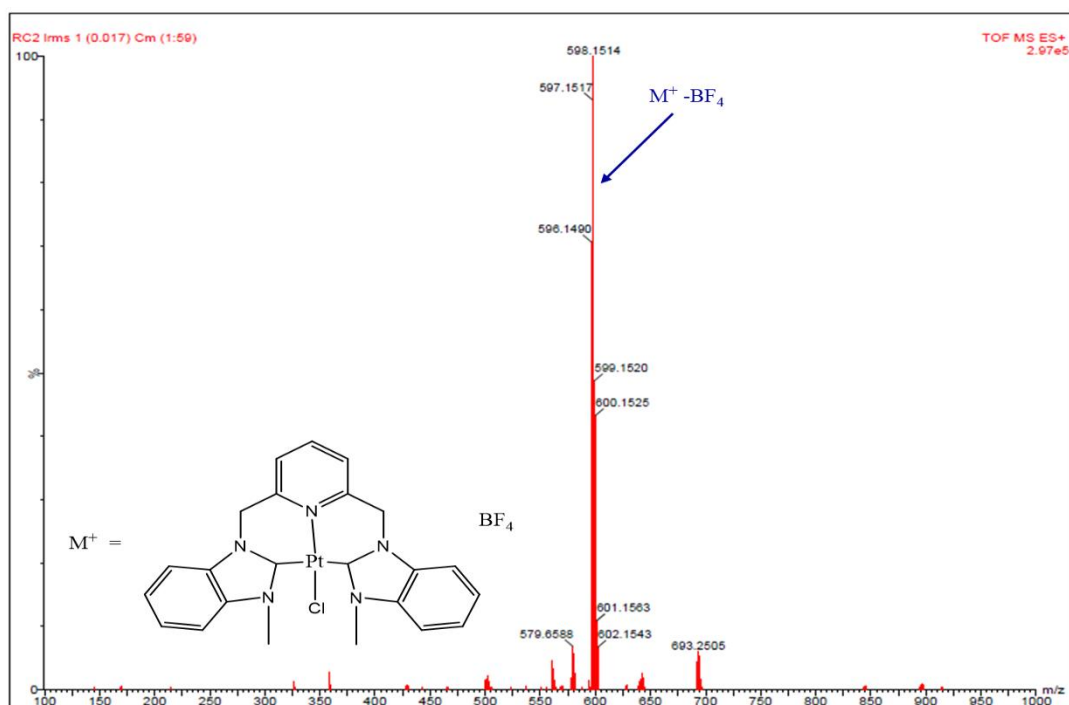

**Fig. S11:** TOF-MS spectra of 2,6-bis[(3-methylbenzimidazol-1-yl)methyl]pyridine platinum(II) chloride tetrafluoroborate complex;  $PtL_2$ .

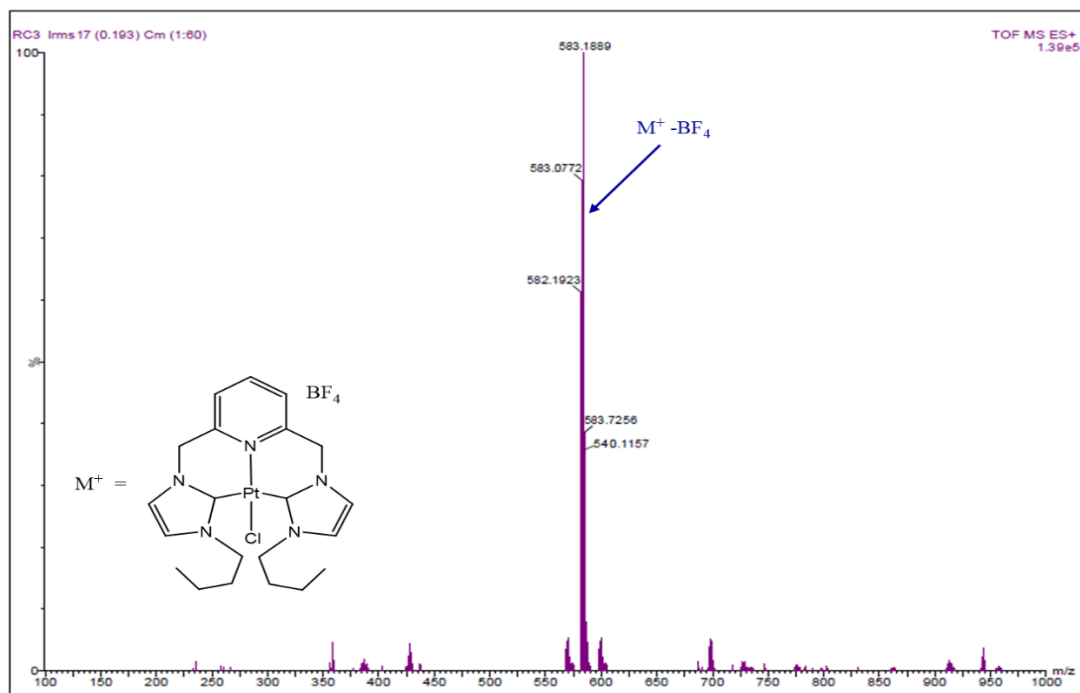

**Fig. S12:** TOF-MS spectra of 2,6-bis[(3-butylimidazol-1-yl)methyl]pyridine platinum(II) chloride tetrafluoroborate complex;  $PtL_3$ .

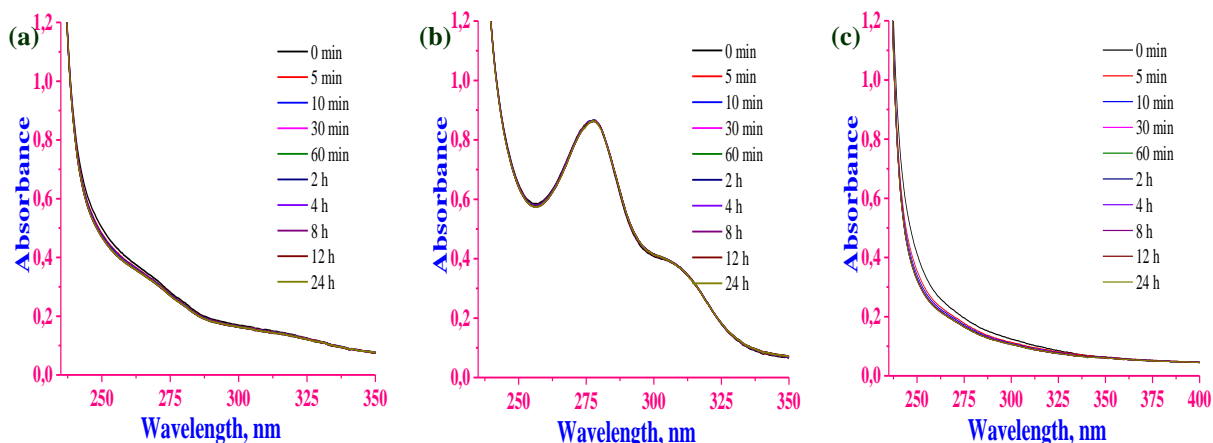

**Fig. S13:** UV-Vis spectra of complexes  $\text{PtL}_1$  (a),  $\text{PtL}_2$  (b) and  $\text{PtL}_3$  (c) in Tris-HCl/50 mM NaCl buffer (pH = 7.2) over a 24 h period.  $[\text{PtL}_1/\text{PtL}_2/\text{PtL}_3] = 5.0 \times 10^{-5} \text{ M}$  and  $T = 35 \text{ }^\circ\text{C}$ .

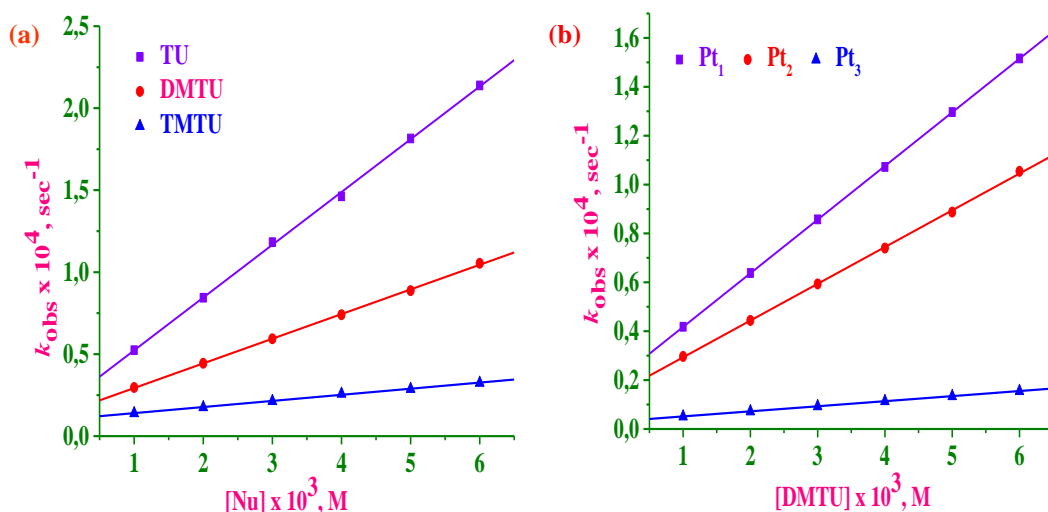

**Fig. S14** Linear plots of  $k_{\text{obs}}$  versus  $[\text{Nu}]$  for the reaction of  $\text{PtL}_2$  with Nu (a) and for the reactions with three Pt(II)  $\text{C}^{\wedge}\text{N}^{\wedge}\text{C}$  pincer complexes ( $\text{PtL}_1$ ,  $\text{PtL}_2$  and  $\text{PtL}_3$ ) with dmtu (b):  $[\text{PtL}_1/\text{PtL}_2/\text{PtL}_3] = 50 \text{ } \mu\text{M}$ , pH = 7.2 (Tris-HCl/50 mM NaCl) and  $T = 35 \text{ }^\circ\text{C}$ .

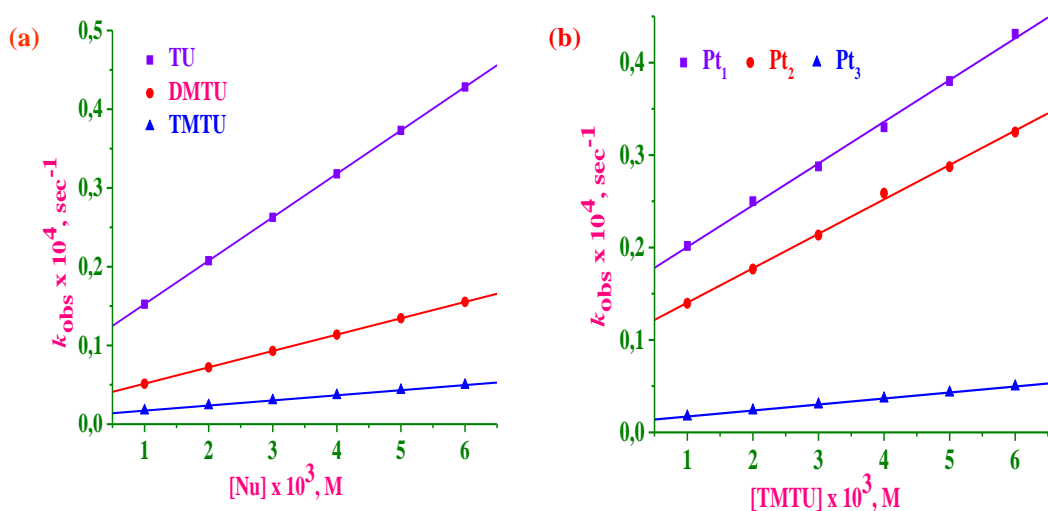

**Fig. S15** Linear plots of  $k_{\text{obs}}$  versus  $[\text{Nu}]$  for the reaction of  $\text{PtL}_3$  with Nu (a) and for the reactions with three Pt(II)  $\text{C}^{\wedge}\text{N}^{\wedge}\text{C}$  pincer complexes ( $\text{PtL}_1$ ,  $\text{PtL}_2$  and  $\text{PtL}_3$ ) with tmtu (b):  $[\text{PtL}_1/\text{PtL}_2/\text{PtL}_3] = 50 \text{ } \mu\text{M}$ , pH = 7.2 (Tris-HCl/50 mM NaCl) and  $T = 35 \text{ }^\circ\text{C}$ .



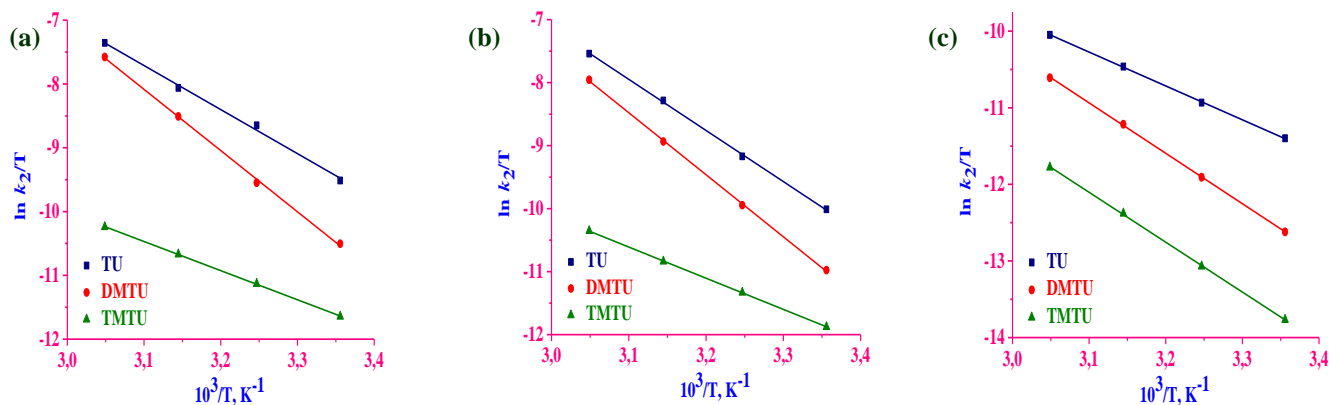

**Fig. S16** Eyring plots for the substitution of chloride from  $PtL_1$  (a),  $PtL_2$  (b) and  $PtL_3$  (c) by TU nucleophiles.

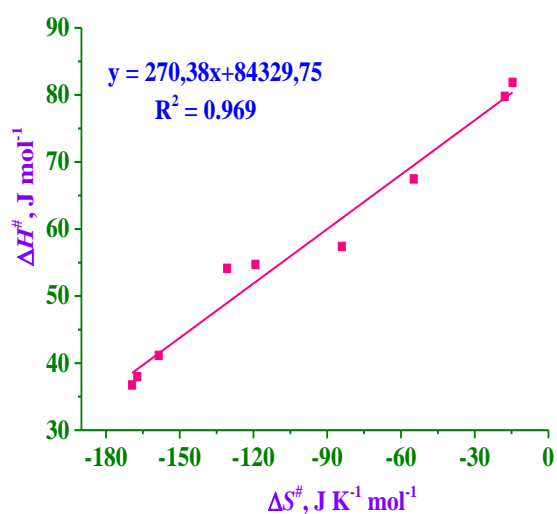

**Fig. S17** Iso-kinetic plots for the substitution of chloride ligands by Nu of all the three Pt(II)  $C^N^C$  pincer complexes.

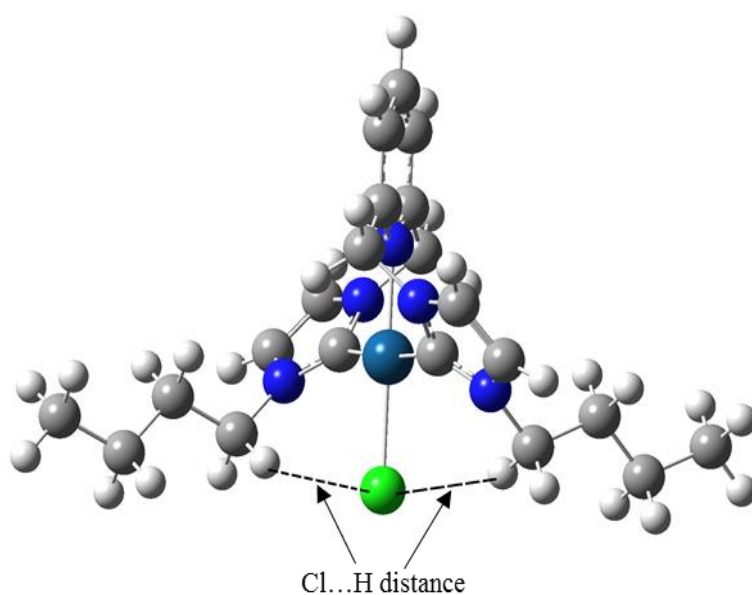

**Fig. S18** DFT optimized structure of  $PtL_3$  representing chlorine *ipso* hydrogen lengths.

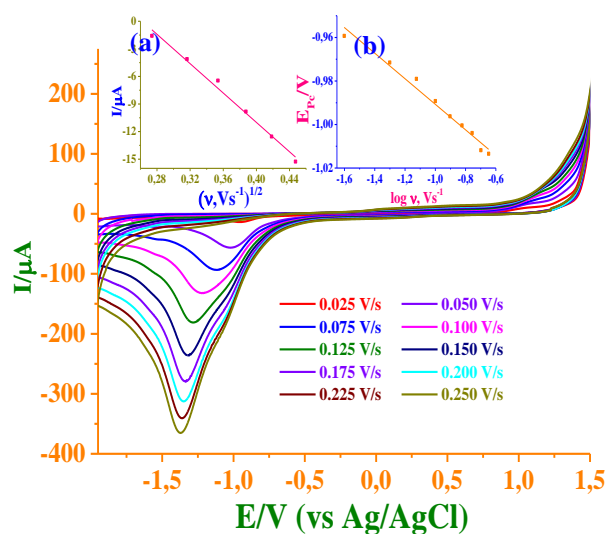

**Fig. S19** Effect of scan rate on the CV for 1.0 mM of  $\text{PtL}_2$  at the different scan rates from 25 to 250 mV/s. Inset: (a) Relationship between reduction peak currents ( $I_{pc}$ ) and the square root of scan rate ( $v$ ); (b) linear relationship between the reduction peak potential ( $E_{pc}$ ) and the logarithm of scan rate.

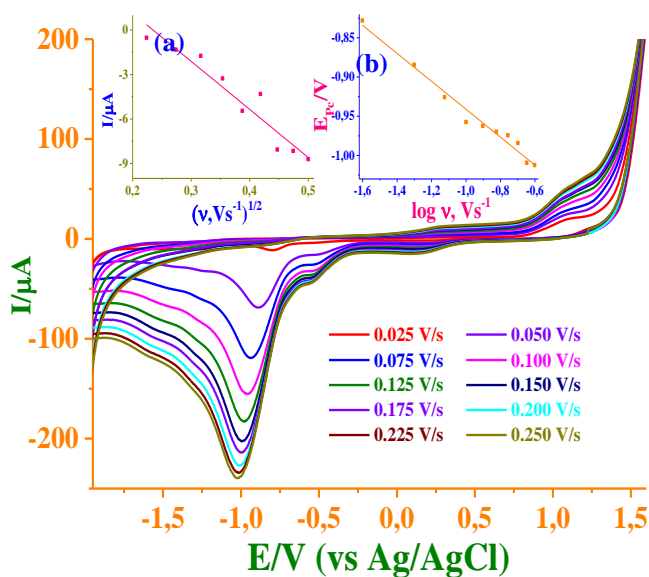

**Fig. S20** Effect of scan rate on the CV for 1.0 mM of  $\text{PtL}_3$  at the different scan rates from 25 to 250 mV/s. Inset: (a) Relationship between reduction peak currents ( $I_{pc}$ ) and the square root of scan rate ( $v$ ); (b) linear relationship between the reduction peak potential ( $E_{pc}$ ) and the logarithm of scan rate.

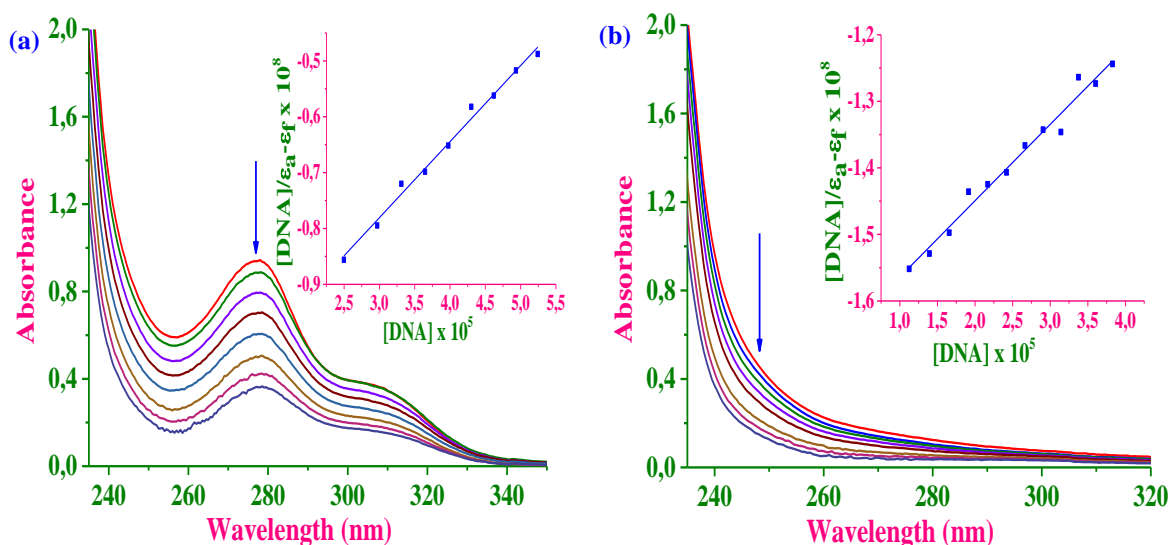

**Fig. S21** Absorption spectra of 48  $\mu\text{M}$  of **PtL<sub>2</sub>** (a) and **PtL<sub>3</sub>** (b) in 5 mM Tris-HCl/50 mM buffer at pH 7.2 upon addition of CT-DNA (0 - 40  $\mu\text{M}$ ). The arrow shows the change in absorbance upon increasing the CT-DNA concentration. Inset: Wolfe-Shimer plot of [CT-DNA] versus  $[\text{DNA}]/(\epsilon_a - \epsilon_f)$ .

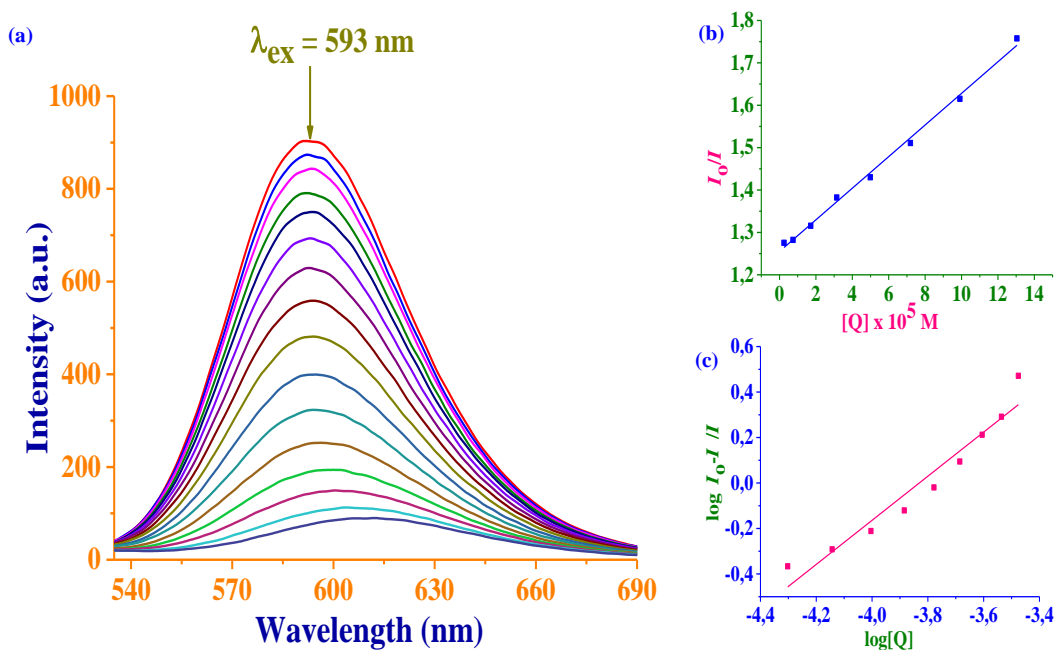

**Fig. S22** Fluorescence emission spectra of EtBr bounded to CT-DNA in the presence of **PtL<sub>2</sub>**(a); [EtBr] = 20.0  $\mu\text{M}$ , [CT-DNA] = 20.0  $\mu\text{M}$  and [PtL<sub>2</sub>] = 0 - 150  $\mu\text{M}$ . The arrow shows the intensity changes upon increasing the **PtL<sub>2</sub>** complex concentration. (b): Stern-Volmer plot of  $I_0/I$  versus [Q] and (c): Scatchard plot of  $\log[(I_0 - I)/I]$  versus  $\log[\text{Q}]$ .

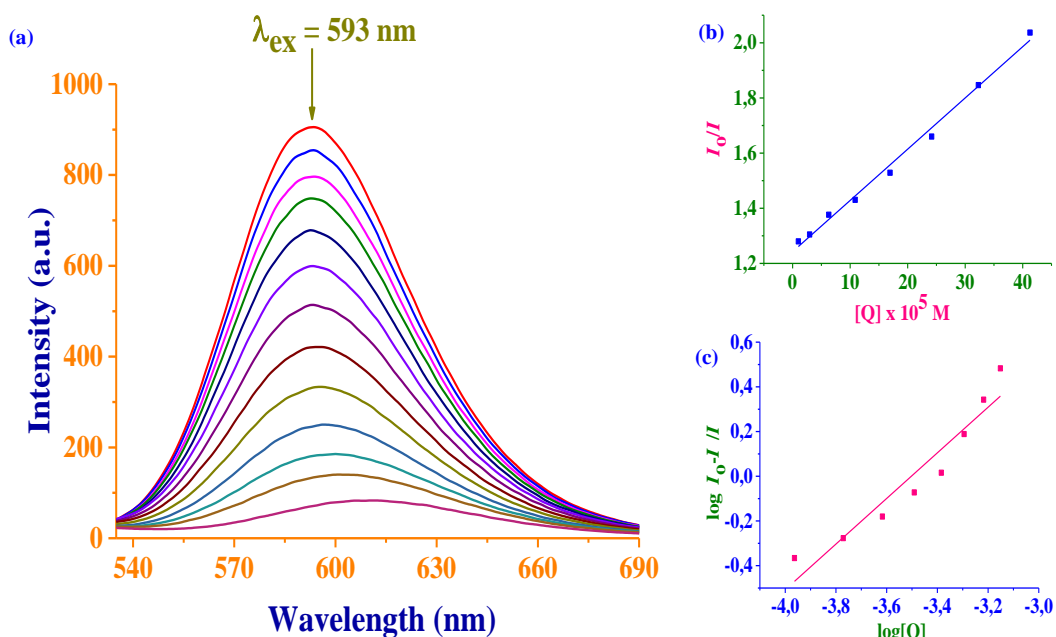

**Fig. S23** Fluorescence emission spectra of EtBr bounded to CT-DNA in the presence of PtL<sub>3</sub>(a); [EtBr] = 20.0  $\mu$ M, [CT-DNA] = 20.0  $\mu$ M and [PtL<sub>3</sub>] = 0-150  $\mu$ M. The arrow shows the intensity changes upon increasing the Pt<sub>3</sub> complex concentration. (b): Stern-Volmer plot of  $I_0/I$  versus [Q] and (c): Scatchard plot of  $\log[(I_0 - I)/I]$  versus  $\log[Q]$ .

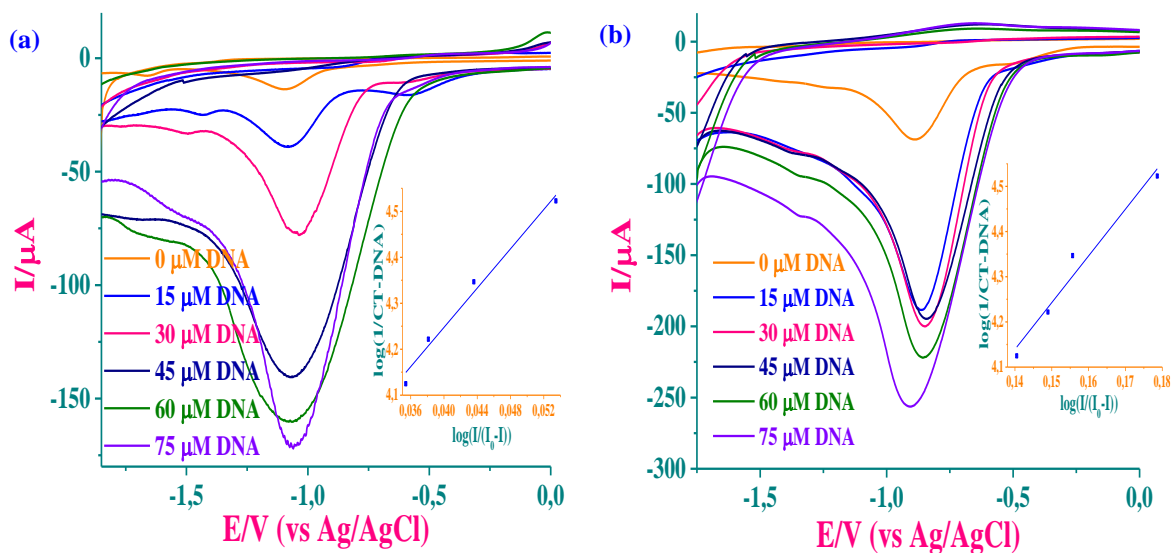

**Fig. S24** Cyclic voltammograms of 1.0 mM of PtL<sub>2</sub> (a) and PtL<sub>3</sub> (b) without and with CT-DNA at 100 mV/s.

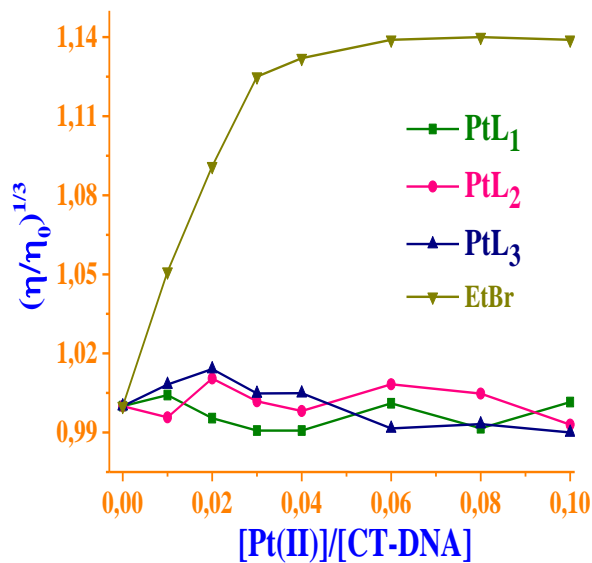

**Fig. S25** Effect of increasing amounts of PtL<sub>1</sub>, PtL<sub>2</sub>, PtL<sub>3</sub> and EtBr on the relative viscosities of CT-DNA in 5 mM Tris-HCl/50 mM NaCl, pH 7.2.

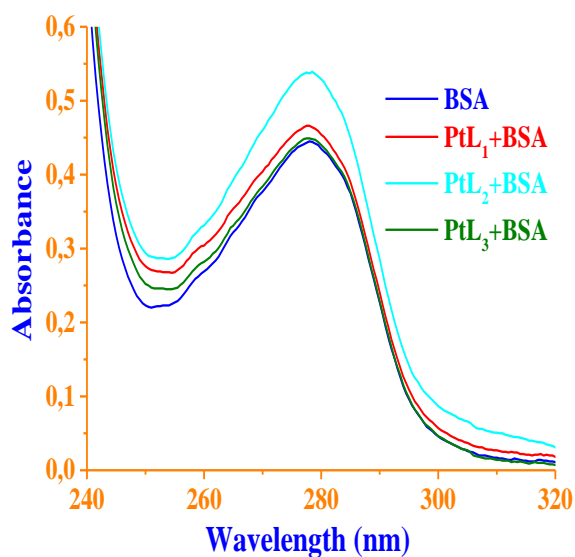

**Fig. S26** Absorption spectra of 10 μM BSA with and without 5 μM of each Pt(II) C<sup>N</sup>C pincer complex.

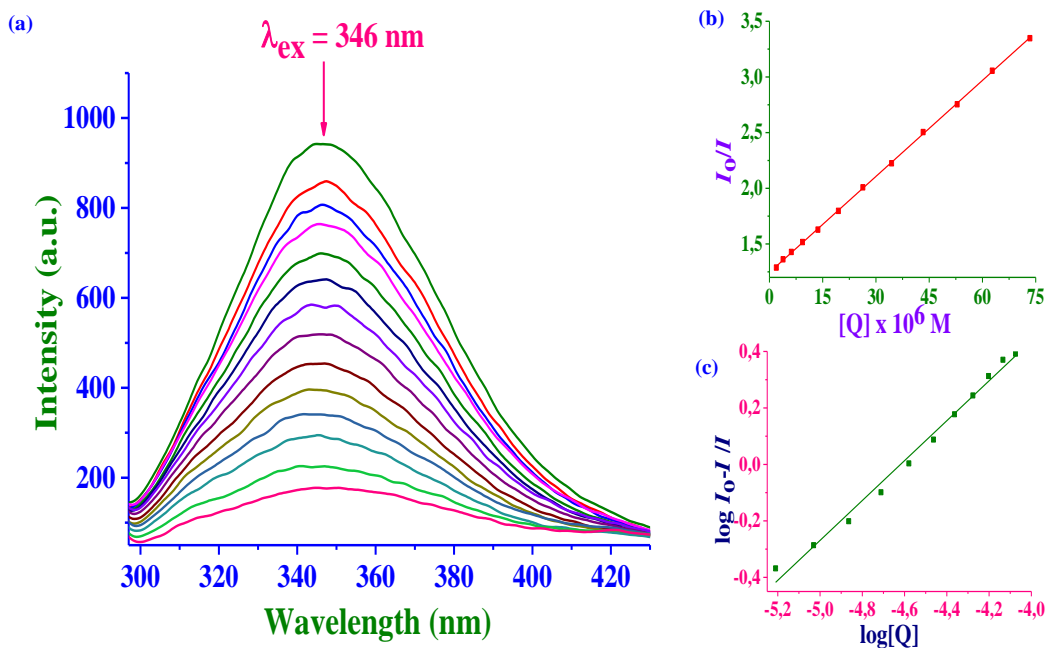

**Fig. S27** Fluorescence emission spectra of BSA in the absence and presence of **PtL<sub>2</sub>**(a); [BSA] = 11.3  $\mu\text{M}$  and [PtL<sub>2</sub>] = 0 - 20  $\mu\text{M}$ . The arrow shows the intensity changes upon increasing the **PtL<sub>2</sub>** complex concentration. **(b)**: Stern-Volmer plot of  $I_0/I$  versus [Q] and **(c)**: Scatchard plot of  $\log[(I_0-I)/I]$  versus  $\log[Q]$ .

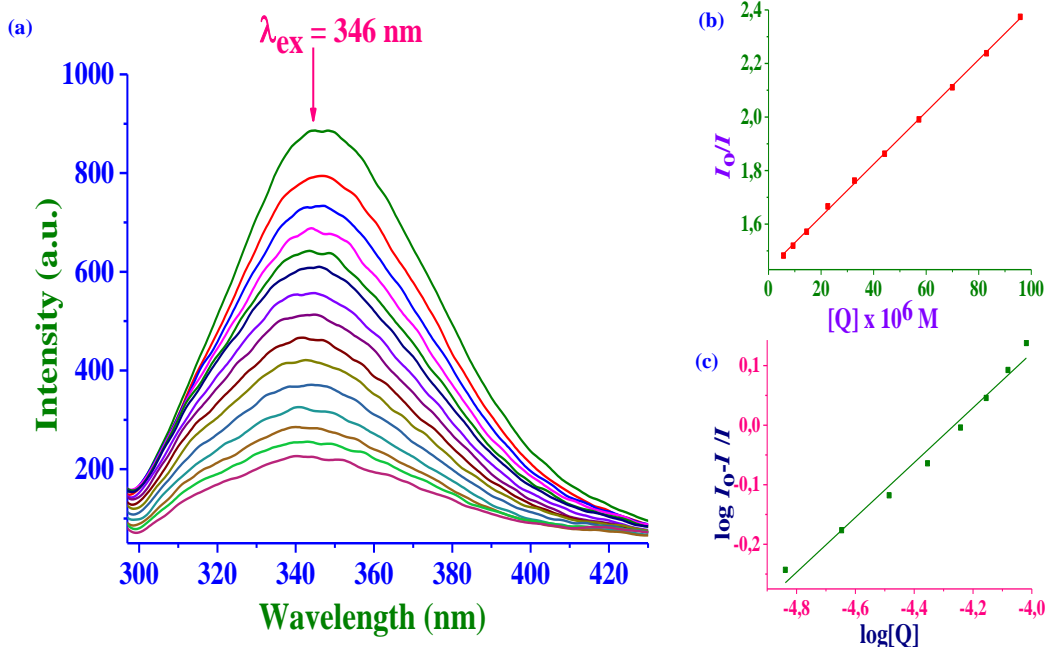

**Fig. S28** Fluorescence emission spectra of BSA in the absence and presence of **PtL<sub>3</sub>**(a); [BSA] = 11.3  $\mu\text{M}$  and [PtL<sub>3</sub>] = 0 - 20  $\mu\text{M}$ . The arrow shows the intensity changes upon increasing the **PtL<sub>3</sub>** complex concentration. **(b)**: Stern-Volmer plot of  $I_0/I$  versus [Q] and **(c)**: Scatchard plot of  $\log[(I_0-I)/I]$  versus  $\log[Q]$ .

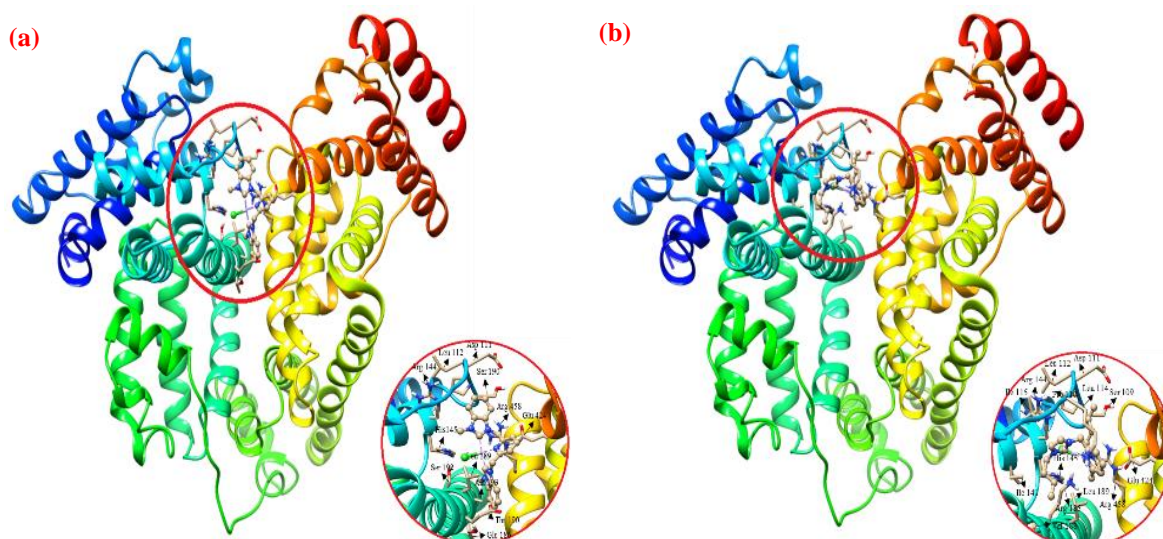

**Fig. S29** The lowest binding free energy conformers obtained between Pt(II) C<sup>N</sup>C pincer complexes (**PtL<sub>2</sub>** (a) / **PtL<sub>3</sub>** (b)) and BSA.

**Table S1** Summary of the second order rate constants,  $k_2$  at 25, 45 and 55 °C for the substitution of aqua molecules by Nu.

| Complex              | Nu   | $k_2 \times 10^2 / \text{M}^{-1} \text{s}^{-1}$ |              |              |
|----------------------|------|-------------------------------------------------|--------------|--------------|
|                      |      | 25 °C                                           | 45 °C        | 55 °C        |
| <br>PtL <sub>1</sub> | tu   | 2.20 ± 0.03                                     | 10.03 ± 0.08 | 20.96 ± 0.27 |
|                      | dmtu | 0.82 ± 0.02                                     | 6.41 ± 0.05  | 16.81 ± 0.21 |
|                      | Tmtu | 0.26 ± 0.01                                     | 0.74 ± 0.02  | 1.17 ± 0.04  |
| <br>PtL <sub>2</sub> | tu   | 1.34 ± 0.05                                     | 8.03 ± 0.7   | 17.44 ± 0.25 |
|                      | dmtu | 0.51 ± 0.03                                     | 4.19 ± 0.04  | 11.51 ± 0.16 |
|                      | Tmtu | 0.21 ± 0.01                                     | 0.63 ± 0.02  | 1.05 ± 0.03  |
| <br>PtL <sub>3</sub> | tu   | 0.33 ± 0.02                                     | 0.91 ± 0.03  | 1.42 ± 0.6   |
|                      | dmtu | 0.09 ± 0.01                                     | 0.43 ± 0.2   | 0.81 ± 0.3   |
|                      | Tmtu | 0.03 ± 0.01                                     | 0.13 ± 0.2   | 0.25 ± 0.2   |

**Table 2** DFT-calculated data for Pt(II) C<sup>^</sup>N<sup>^</sup>C pincer complexes

| Complex                    | PtL <sub>1</sub> | PtL <sub>2</sub> | PtL <sub>3</sub> |
|----------------------------|------------------|------------------|------------------|
| MO energy (eV)             |                  |                  |                  |
| I = -E <sub>HOMO</sub>     | 6.772            | 6.829            | 6.691            |
| A = -E <sub>LUMO</sub>     | 2.389            | 2.230            | 2.327            |
| ΔE <sub>LUMO-HOMO</sub>    | 4.383            | 4.600            | 4.364            |
| <b>NBO charge</b>          |                  |                  |                  |
| Pt <sup>2+</sup>           | 0.242            | 0.261            | 0.246            |
| Cl <sup>-</sup>            | -0.454           | -0.451           | -0.453           |
| N <sub>1=5</sub>           | -0.413           | -0.415           | -0.421           |
| N <sub>2=4</sub>           | -0.430           | -0.435           | -0.430           |
| <b>Bond lengths (Å)</b>    |                  |                  |                  |
| Pt-Cl                      | 2.445            | 2.443            | 2.442            |
| Pt-N <sub>py</sub>         | 2.073            | 2.069            | 2.704            |
| Pt-C <sub>1=2</sub>        | 2.048            | 2.046            | 2.050            |
| H...Cl                     | 2.694            | 2.702            | 2.051            |
|                            |                  |                  |                  |
| Electronegativity (χ)      | 4.581            | 4.530            | 4.509            |
| Chemical softness (σ)      | 0.456            | 0.435            | 0.458            |
| Chemical hardness (η)      | 2.192            | 2.300            | 2.182            |
| Electrophilicity index (ω) | 4.787            | 4.461            | 4.659            |
| Dipole moment (D)          | 12.705           | 12.368           | 13.722           |

**Table S3** Electrochemical potentials and current values of Pt(II) C<sup>^</sup>N<sup>^</sup>C pincer complexes with and without CT-DNA at scan rate 100 mV/s.

| Complex,<br>(1.0 mM) | E <sub>pc</sub> , V |           | Current, A               |                          |
|----------------------|---------------------|-----------|--------------------------|--------------------------|
|                      | 0 μM DNA            | 75 μM DNA | 0 μM DNA                 | 75 μM DNA                |
| PtL <sub>1</sub>     | -0.882              | -0.904    | -6.87 x 10 <sup>-5</sup> | -2.56 x 10 <sup>-4</sup> |
| PtL <sub>2</sub>     | -1.084              | -1.060    | -4.48 x 10 <sup>-5</sup> | -1.92 x 10 <sup>-4</sup> |
| PtL <sub>3</sub>     | -1.050              | -1.026    | -1.36 x 10 <sup>-5</sup> | -1.72 x 10 <sup>-4</sup> |
